# Supplementary material for: A systematic analysis on the clinical safety and efficacy of onco-virotherapy
Source: PubMed Central journal article supplement (PMC8551473; doi:10.1016/j.omto.2021.09.008), 2021-10-05
Supplement: mmc1.pdf [file mmc1.pdf]

**OMTO, Volume 23**

**Supplemental information**

**A systematic analysis on the clinical  
safety and efficacy of onco-virotherapy**

**Darshak K. Bhatt, Lieske Wekema, Luciana Rodrigues Carvalho Barros, Roger Chammas, and Toos Daemen**

## Supplementary Information

### 1. Search Strategy

We retrieved clinical trials from the *clinicaltrials.gov* registry (<https://clinicaltrials.gov>) and PubMed (<http://www.ncbi.nlm.nih.gov/PubMed>) and EMBASE (<https://www.embase.com>) databases at the start of August 2020. For each medium we used a different search strategy, as specified below.

- *ClinicalTrials.gov*

We obtained clinical trials from the *clinicaltrials.gov* registry using the following settings:

|                                                                               |
|-------------------------------------------------------------------------------|
| Status: "All studies" / Condition or disease: "Cancer" / Other terms: "Virus" |
|-------------------------------------------------------------------------------|

- *PubMed*

In cooperation with the Central Medical Library (CMB) of the University Medical Center Groningen (UMCG), we constructed a PubMed search strategy based on our PICOS framework:

|                                                                                                                                                                                                                                                           |
|-----------------------------------------------------------------------------------------------------------------------------------------------------------------------------------------------------------------------------------------------------------|
| ("Neoplasms"[Mesh] OR "Oncolytic Virotherapy"[Mesh] OR neoplasia*[tiab] OR neoplasm*[tiab] OR tumor[tiab] OR tumors[tiab] OR tumour*[tiab] OR cancer*[tiab] OR malignan*[tiab] OR carcinoma*[tiab] OR metasta*[tiab] OR melanom*[tiab] OR oncolyt*[tiab]) |
|-----------------------------------------------------------------------------------------------------------------------------------------------------------------------------------------------------------------------------------------------------------|

AND

|                                                                                                                                                                                                                                                                                                                                                                                                                                                                                                            |
|------------------------------------------------------------------------------------------------------------------------------------------------------------------------------------------------------------------------------------------------------------------------------------------------------------------------------------------------------------------------------------------------------------------------------------------------------------------------------------------------------------|
| ("Oncolytic Virotherapy"[Mesh] OR "Oncolytic Viruses"[Mesh] OR virotherap*[tiab] OR (oncoly*[tiab] AND (virus*[tiab] OR viral[tiab] OR adenovir*[tiab] OR reovirus*[tiab] OR poxvirus*[tiab] OR gene[tiab] OR genes[tiab] OR herpes*[tiab])) OR ((administration*[ti] OR target*[ti] OR therap*[ti] OR treatment[ti] OR intratumo*[tiab] OR inject*[ti] OR intravenous[ti] OR immunotherap*[ti]) AND (virus*[ti] OR reolysin[ti] OR reovirus*[ti] OR poxvirus[ti] OR adenovirus*[ti])) OR replicon*[tiab]) |
|------------------------------------------------------------------------------------------------------------------------------------------------------------------------------------------------------------------------------------------------------------------------------------------------------------------------------------------------------------------------------------------------------------------------------------------------------------------------------------------------------------|

AND

("Clinical Trial" [Publication Type] OR "Clinical Trials as Topic"[Mesh] OR "Cohort Studies"[Mesh] OR "Observational Study" [Publication Type] OR "Case Reports" [Publication Type] OR "Prognosis"[Mesh] OR random\*[tiab] OR controlled study[tiab] OR clinical study[tiab] OR trial[tiab] OR cohort[tiab] OR prospectiv\*[tiab] OR follow-up[tiab] OR study[ti])

NOT

("Animals"[Mesh] NOT "Humans"[Mesh])

NOT

(epstein[tiab] OR epstein[ti] OR EBV[tiab] OR papillomavir\*[tiab] OR papillomavir\*[ti] OR hepatitis\*[tiab] OR hepatitis[ti] OR HCV[tiab] OR HCV[ti] OR HBV[ti] OR HBV[tiab] OR HIV[tiab] OR HIV[ti])

- *EMBASE*

In cooperation with the CMB of the UMCG, we re-wrote the PubMed search strategy into a search strategy that was suitable for the EMBASE database:

('neoplasm'/exp OR 'oncolytic virotherapy'/exp OR (neoplasia\* OR neoplasm\* OR tumor OR tumors OR tumour\* OR cancer\* OR malignan\* OR carcinoma\* OR metasta\* OR melanom\* OR oncolyt\*):ab,ti)

AND

('oncolytic virotherapy'/exp OR 'oncolytic virus'/exp OR virotherap\*:ab,ti OR (oncoly\* AND (virus\* OR viral OR adenovir\* OR reovirus\* OR poxvirus\* OR gene OR genes OR herpes\*)):ab,ti OR ((administration\* OR target\* OR therap\* OR treatment OR intratumo\*

OR inject\* OR intravenous OR immunotherap\* OR trial) AND (virus\* OR reolysin OR reovirus\* OR poxvirus OR adenovirus\*)):ti OR replicon\*:ab,ti)

AND

('clinical trial'/exp OR 'intervention study'/exp OR 'longitudinal study'/exp OR 'major clinical study'/exp OR 'prospective study'/exp OR 'cohort analysis'/exp OR 'follow up'/exp OR 'observational study'/exp OR (random\* OR 'controlled study' OR 'clinical study' OR trial OR cohort OR prospectiv\* OR 'follow-up'):ab,ti OR study:ti)

NOT

('animal'/exp NOT 'human'/exp)

NOT

('conference abstract'/it OR 'review'/it)

NOT

(hepatitis:ti OR hiv:ti OR 'epstein barr':ti)

- 2. Supplementary table 1, containing the dataset obtained after systematic search and review; with each article or trial listed in row, while respective variable of interest organized in columns.**
